# Supplementary material
Source: Springer Nature journal article supplement (https://www.springermedizin.de/resource/supplementary/12891_2012_1675_MOESM1_ESM.pdf/9509046)

CASE-COHORT

Total Cohort  
n=400

CASES

Random selection of controls  
receive US by radiologist  
n=60

History taking &  
physical examination  
T1: Baseline questionnaire for  
patient and PT

Additional US as a standard  
procedure by PT  
n=60

US by radiologist

Physiotherapeutic intervention  
Usual Care

Follow-up measurements  
6, 12 and 26 weeks

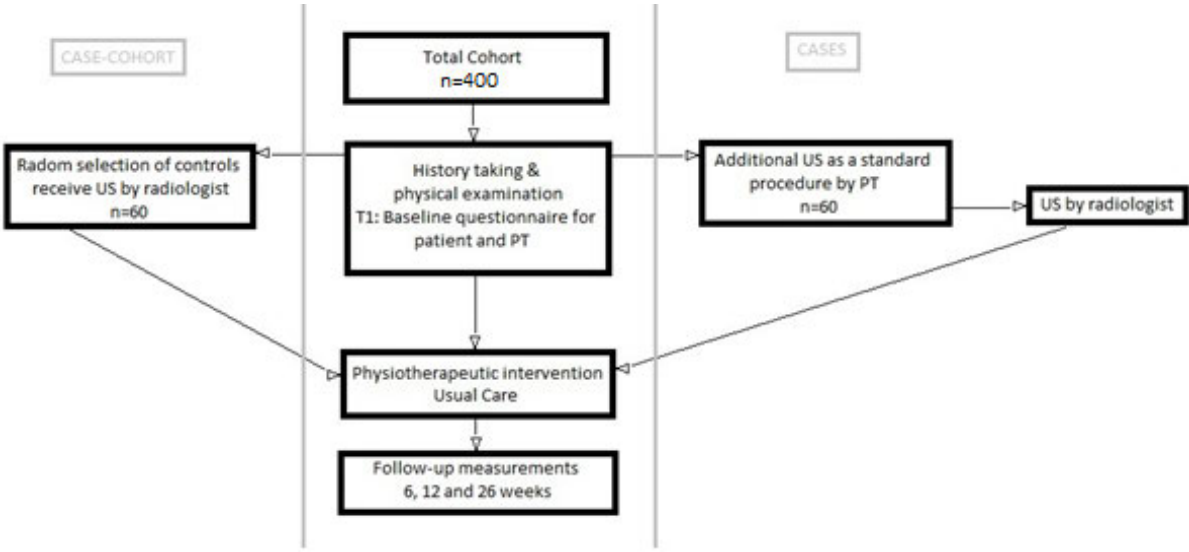

Supplement: MOESM1 [file 9509046]
